# Supplementary material for: Human-machine interface for two-dimensional steering control with the auricular muscles
Source: Frontiers journal article supplement (doi:10.3389/fnbot.2023.1154427), 2023-06-05
Supplement: Data_Sheet_1.PDF [file Data_Sheet_1.PDF]

**Table S1:** Individual success rate throughout the training for the single-task – Cohen’s  $d = 1.81$  (1<sup>st</sup> and 5<sup>th</sup> session; large effect size)

|          | Sessions |        |        |        |        |         |
|----------|----------|--------|--------|--------|--------|---------|
|          |          | 1st    | 2nd    | 3rd    | 4th    | 5th     |
| Subjects | S01      | 19.44% | 5.56%  | 22.22% | 33.33% | 72.22%  |
|          | S02      | 55.56% | 44.44% | 66.67% | 77.78% | 100.00% |
|          | S03      | 52.78% | 61.11% | 61.11% | 55.56% | 72.22%  |
|          | S04      | 2.78%  | 16.67% | 33.33% | 27.78% | 66.67%  |
|          | S05      | 58.33% | 72.22% | 66.67% | 61.11% | 72.22%  |

**Table S2:** Individual final distance from the target throughout the training for the single-task (mean  $\pm$  standard error in points) – Cohen’s  $d = 1.75$  (1<sup>st</sup> and 5<sup>th</sup> session; large effect size)

|          | Sessions |                  |                   |                  |                  |                 |
|----------|----------|------------------|-------------------|------------------|------------------|-----------------|
|          |          | 1st              | 2 <sup>nd</sup>   | 3rd              | 4th              | 5th             |
| Subjects | S01      | 34.48 $\pm$ 4.57 | 50.02 $\pm$ 11.44 | 33.15 $\pm$ 5.88 | 16.93 $\pm$ 3.82 | 9.01 $\pm$ 2.93 |
|          | S02      | 19.61 $\pm$ 3.52 | 17.56 $\pm$ 4.99  | 15.41 $\pm$ 5.09 | 6.44 $\pm$ 1.54  | 3.80 $\pm$ 0.68 |
|          | S03      | 15.80 $\pm$ 3.11 | 14.68 $\pm$ 4.43  | 14.89 $\pm$ 4.63 | 21.45 $\pm$ 5.35 | 6.96 $\pm$ 1.59 |
|          | S04      | 32.56 $\pm$ 4.80 | 21.72 $\pm$ 4.25  | 17.32 $\pm$ 3.60 | 22.41 $\pm$ 5.19 | 8.99 $\pm$ 3.55 |
|          | S05      | 8.31 $\pm$ 1.47  | 8.32 $\pm$ 2.35   | 10.83 $\pm$ 3.49 | 3.65 $\pm$ 0.40  | 3.47 $\pm$ 0.41 |

**Table S3:** Individual success rate throughout the training for the dual-task – Cohen’s  $d = 3.53$  (2<sup>st</sup> and 5<sup>th</sup> session)

|          | Sessions |        |        |        |         |
|----------|----------|--------|--------|--------|---------|
|          |          | 2nd    | 3rd    | 4th    | 5th     |
| Subjects | S01      | 5.56%  | 22.22% | 55.55% | 61.11%  |
|          | S02      | 50.00% | 55.56% | 83.33% | 83.33%  |
|          | S03      | 33.33% | 50.00% | 44.44% | 66.67%  |
|          | S04      | 22.22% | 38.89% | 50.00% | 61.11%  |
|          | S05      | 72.22% | 55.56% | 72.22% | 100.00% |

**Table S4:** Individual final distance from the target throughout the training for the dual-task (mean  $\pm$  standard error in points) – Cohen’s  $d = 1.13$  (1<sup>st</sup> and 5<sup>th</sup> session; large effect size)

|          | Sessions |                  |                  |                  |                  |
|----------|----------|------------------|------------------|------------------|------------------|
| Subjects |          | 2nd              | 3rd              | 4th              | 5th              |
|          | S01      | 63.37 $\pm$ 9.33 | 33.52 $\pm$ 5.95 | 6.25 $\pm$ 1.20  | 7.84 $\pm$ 1.74  |
|          | S02      | 25.85 $\pm$ 7.54 | 14.18 $\pm$ 4.39 | 7.90 $\pm$ 3.51  | 8.37 $\pm$ 3.47  |
|          | S03      | 22.94 $\pm$ 5.28 | 16.38 $\pm$ 5.84 | 21.88 $\pm$ 6.34 | 9.96 $\pm$ 4.00  |
|          | S04      | 29.29 $\pm$ 6.06 | 23.80 $\pm$ 5.54 | 12.26 $\pm$ 3.27 | 13.85 $\pm$ 3.78 |
|          | S05      | 11.51 $\pm$ 3.20 | 11.04 $\pm$ 3.19 | 4.26 $\pm$ 1.06  | 4.23 $\pm$ 0.45  |
